# Supplementary material for: Facile and large-scale synthesis of functional poly(m-phenylenediamine) nanoparticles by Cu2+-assisted method with superior ability for dye adsorption
Source: Royal Society of Chemistry journal article supplement (doi:10.1039/c2jm32859c), 2012-01-01
Supplement: c2jm32859c.pdf [file c2jm32859c.pdf]

# Facile and Large-scale Synthesis of Functional Poly(m-phenylenediamine) Nanoparticles by Cu<sup>2+</sup>-assisting Method with Superior Ability for Dye Adsorption

Liyuan Zhang,<sup>a</sup> Haiying Wang,<sup>a,b</sup> Wanting Yu,<sup>a</sup> Zhen Su,<sup>a</sup> Liyuan Chai,<sup>\*a, b</sup> Jiehong Li,<sup>a</sup> and Yu Shi<sup>a</sup>

## Electronic Supplementary Information

|                                                                                                                                     |    |
|-------------------------------------------------------------------------------------------------------------------------------------|----|
| <b>Fig. S1</b> The synthesis sketch map of the PmPD. ....                                                                           | 2  |
| <b>Fig. S2</b> Calibrated curve of Orange G. ....                                                                                   | 3  |
| <b>Fig. S3</b> Representative TEM images of the PmPD. ....                                                                          | 4  |
| <b>Fig. S4</b> Procedures and results of polymerization by “rapid mixing”. ....                                                     | 5  |
| <b>Fig. S5</b> FTIR spectra of suspended intermediate formed before the polymerization. ....                                        | 6  |
| <b>Fig. S6</b> EDS spectra of suspended intermediate formed before the polymerization. ....                                         | 7  |
| <b>Fig. S7</b> TG of suspended intermediate formed before the polymerization. ....                                                  | 8  |
| <b>Fig. S8</b> UV-vis spectra of suspended intermediate formed before the polymerization. ....                                      | 10 |
| <b>Fig. S9</b> UV-vis spectrum of mPD. ....                                                                                         | 11 |
| <b>Fig. S10</b> TEM images of complex precipitate. ....                                                                             | 12 |
| <b>Fig. S11</b> The polymerization replacing the Cu <sup>2+</sup> with the complex nanoparticle structure (0.1 g). ....             | 13 |
| <b>Fig. S12</b> SEM image and yield of the PmPD synthesized with HCl solution as solvent at the presence of Cu <sup>2+</sup> . .... | 14 |
| <b>Fig. S13</b> Cu concentration in solution before, during and after the polymerization. ....                                      | 15 |
| <b>Fig. S14</b> pH versus time for the polymerization. ....                                                                         | 16 |
| <b>Table S1.</b> The molecular weight of complex precipitate. ....                                                                  | 17 |
| <b>Table S2.</b> Kinetics model equation for Orange G adsorption onto the PmPD. ....                                                | 18 |
| <b>Table S3.</b> Isotherm model equations for Orange G adsorption onto the PmPD. ....                                               | 19 |

<sup>a</sup> Department of Environmental Engineering, School of Metallurgical Science and Engineering, Central South University, Changsha 410017, China. Fax/Tel: 86 0731 88710171; E-mail: liyuan.chai@yahoo.com.cn

<sup>b</sup> National Engineering Research Centre for Heavy Metals Pollution Control and Treatment, Changsha 410017, China. Fax/Tel: 86 0731 88710171; E-mail: liyuan.chai@yahoo.com.cn

**Fig. S1** The synthesis sketch map of the PmPD.

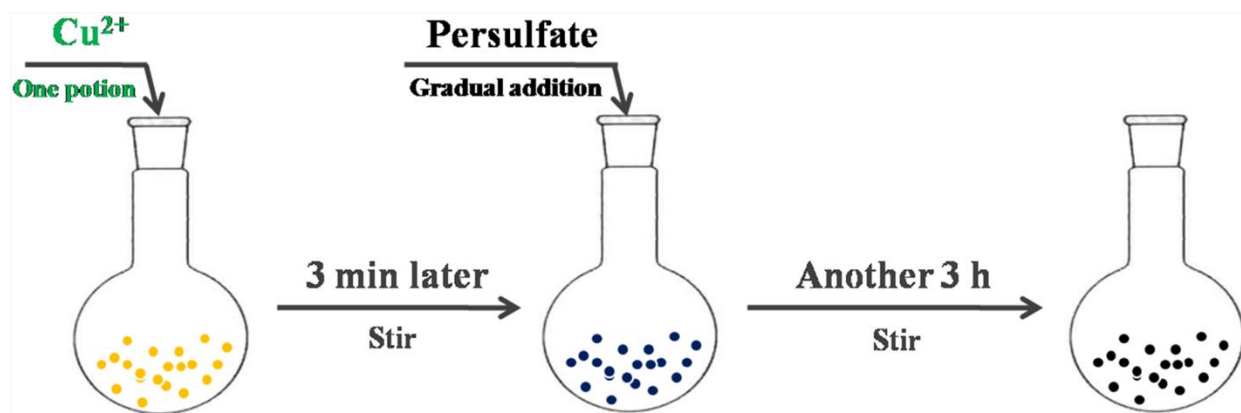

**Fig. S2** Calibrated curve of Orange G.

The Orange G concentration was selected in the range of 5~15  $\text{mg}\cdot\text{L}^{-1}$  since the absorbance of Orange G in such concentration is within 0.2~0.8, which is the best choice for spectrophotometric method. The linear regression equation is:  $Y=0.04727\times X-0.029$ . The correlation efficiency of the relationship is 0.99913.

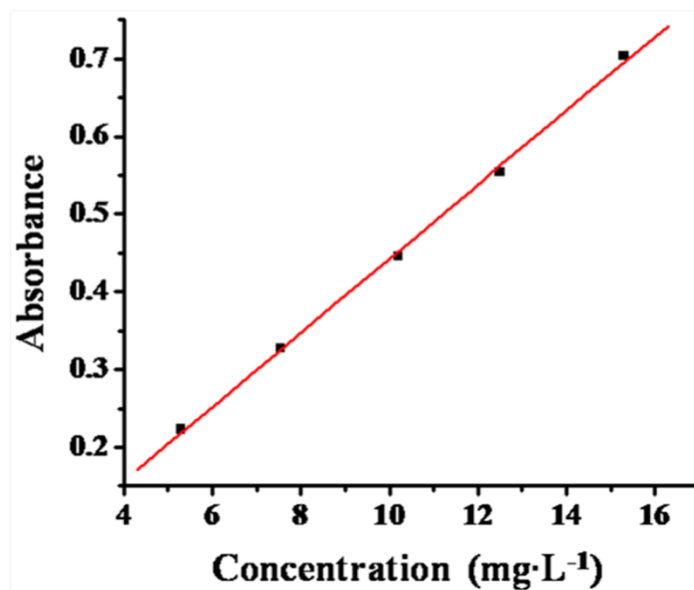

**Fig. S3** Representative TEM images of the PmPD.

*A*: PmPD-N0; *B*: PmPD-C1; *C*: PmPD-C2; *D*: PmPD-C3; *E*: PmPD-C4.

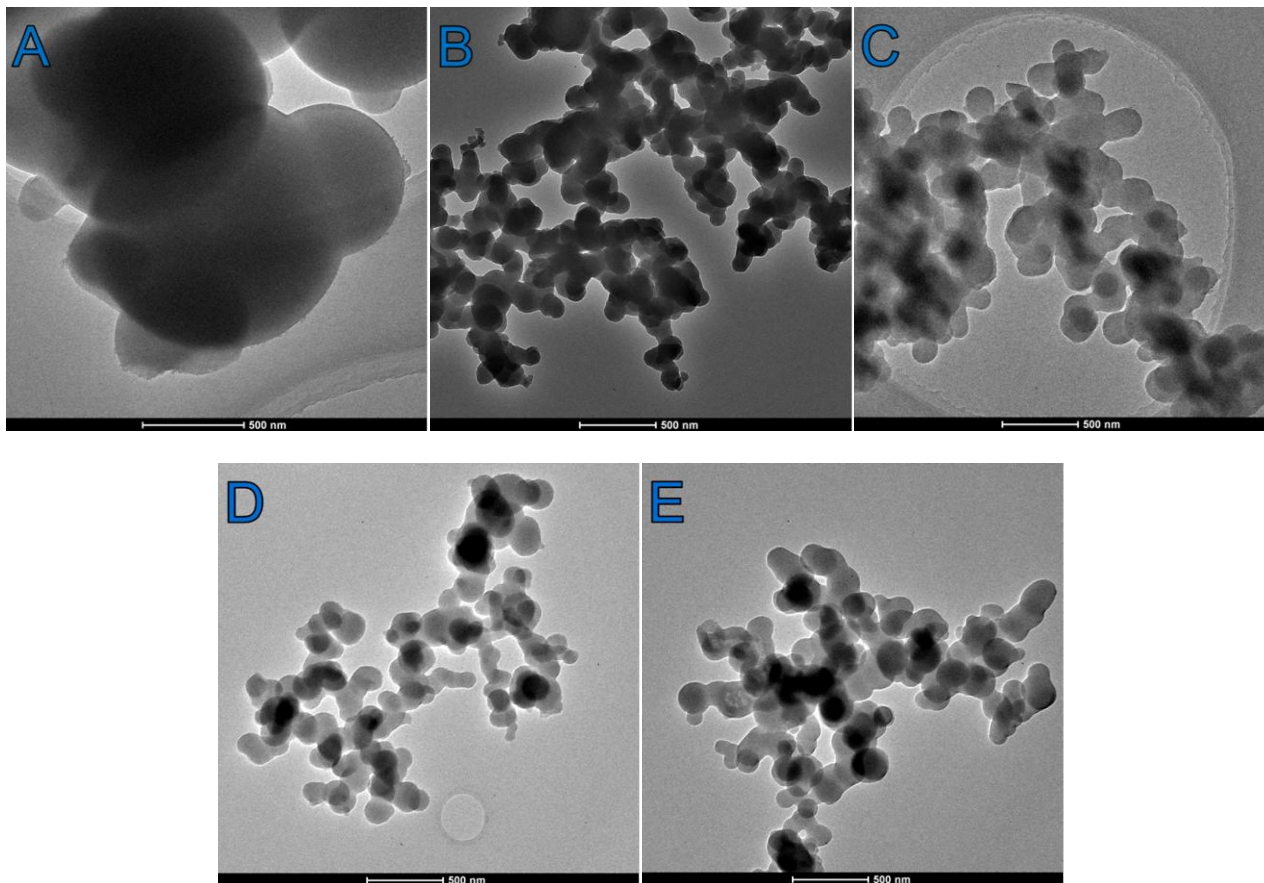

From TEM images in Fig. S3, the size of PmPD-C1 (B), -C2 (C), -C3 (D) and -C4 (E) is similar, but much smaller than that of the PmPD-N0 (A). This is identical with the SEM results in the main text.

**Fig. S4** Procedures and results of polymerization by “rapid mixing”.

Synthesis procedure: 3 g of mPD was dissolved in 100 mL of distilled water and pre-warmed in water bath at 30 °C. Then persulfate solution ( $\sim 1.47 \text{ mol L}^{-1}$ ) was given rapidly and solution was vigorously stirred for 10 s. Then the reaction was proceeded for another 3 h.

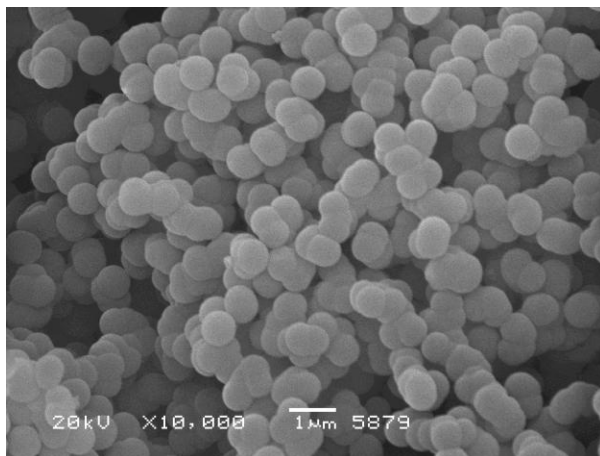

**Fig. S5** FTIR spectra of suspended intermediate formed before the polymerization.

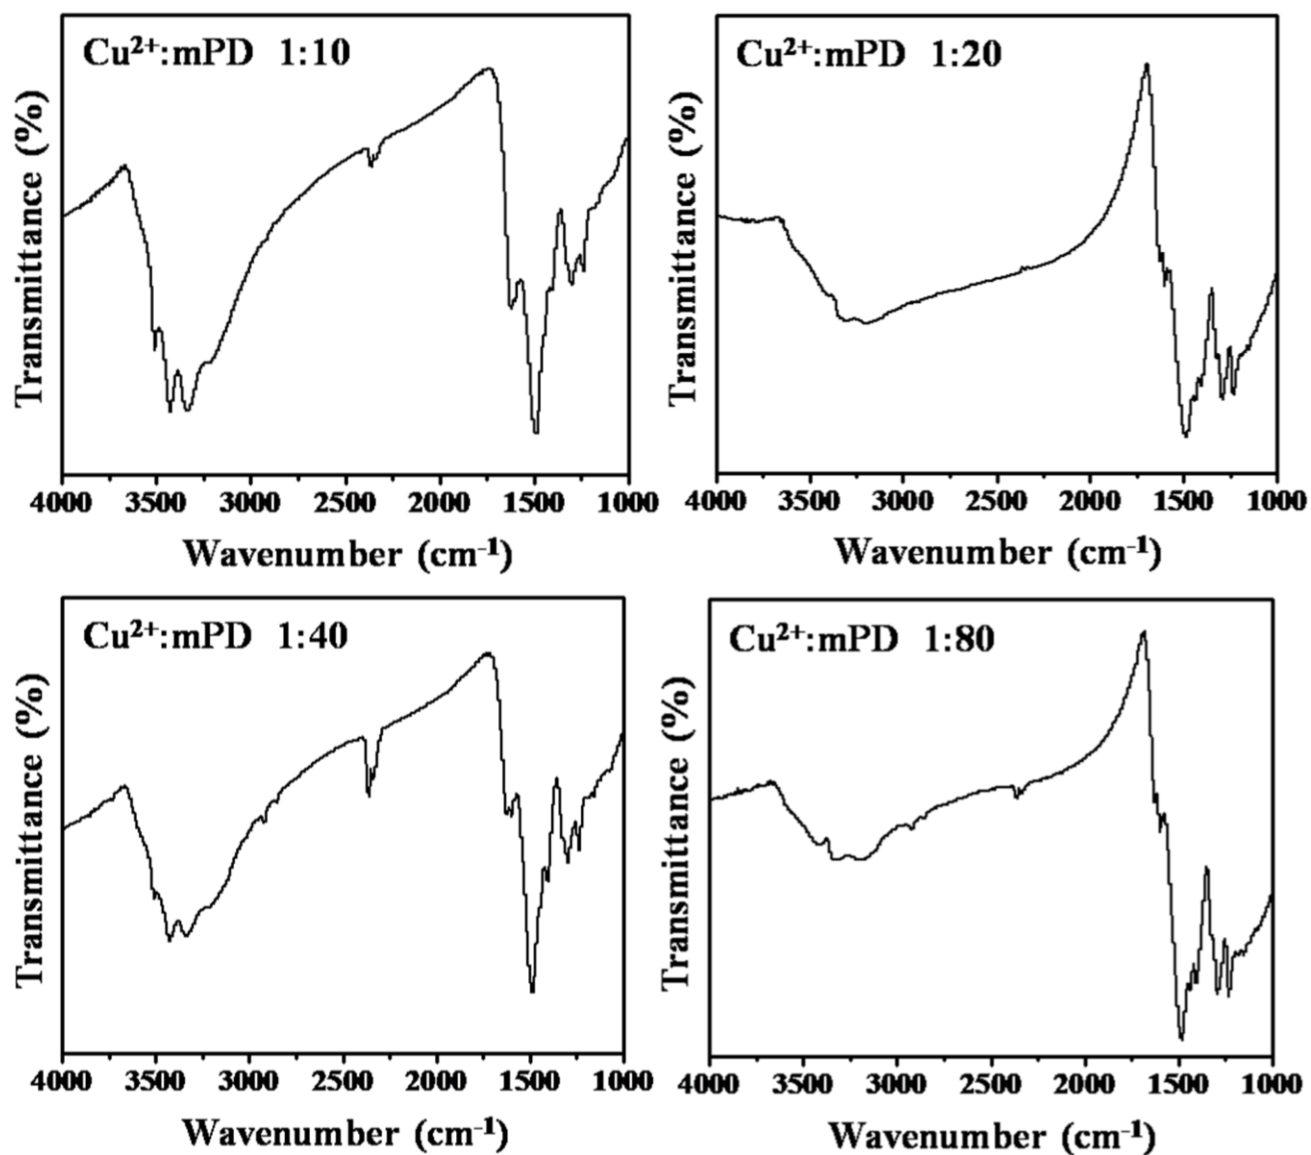

**Fig. S6** EDS spectra of suspended intermediate formed before the polymerization.

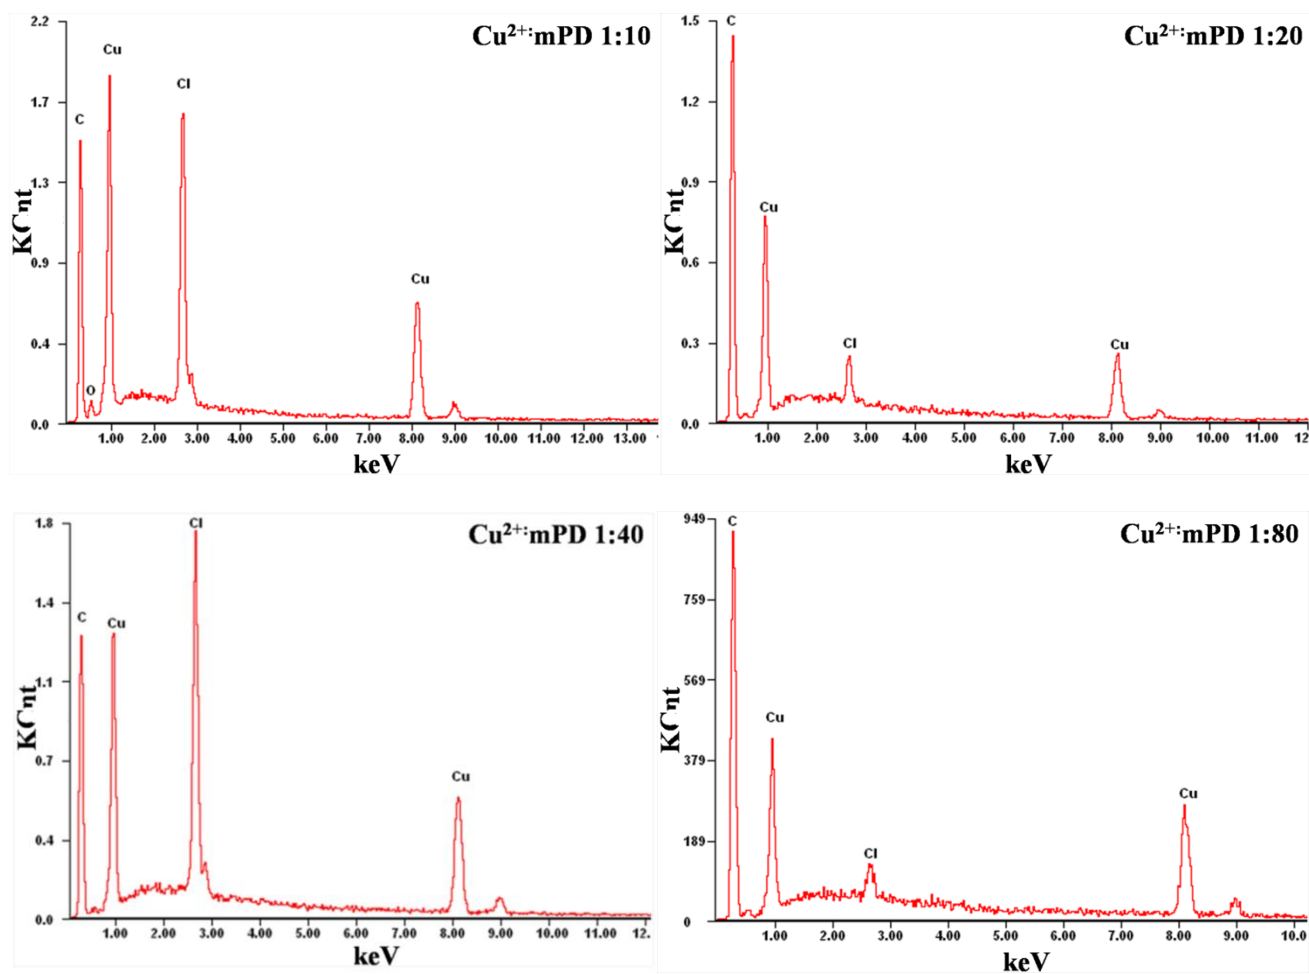

**Fig. S7** TG of suspended intermediate formed before the polymerization.

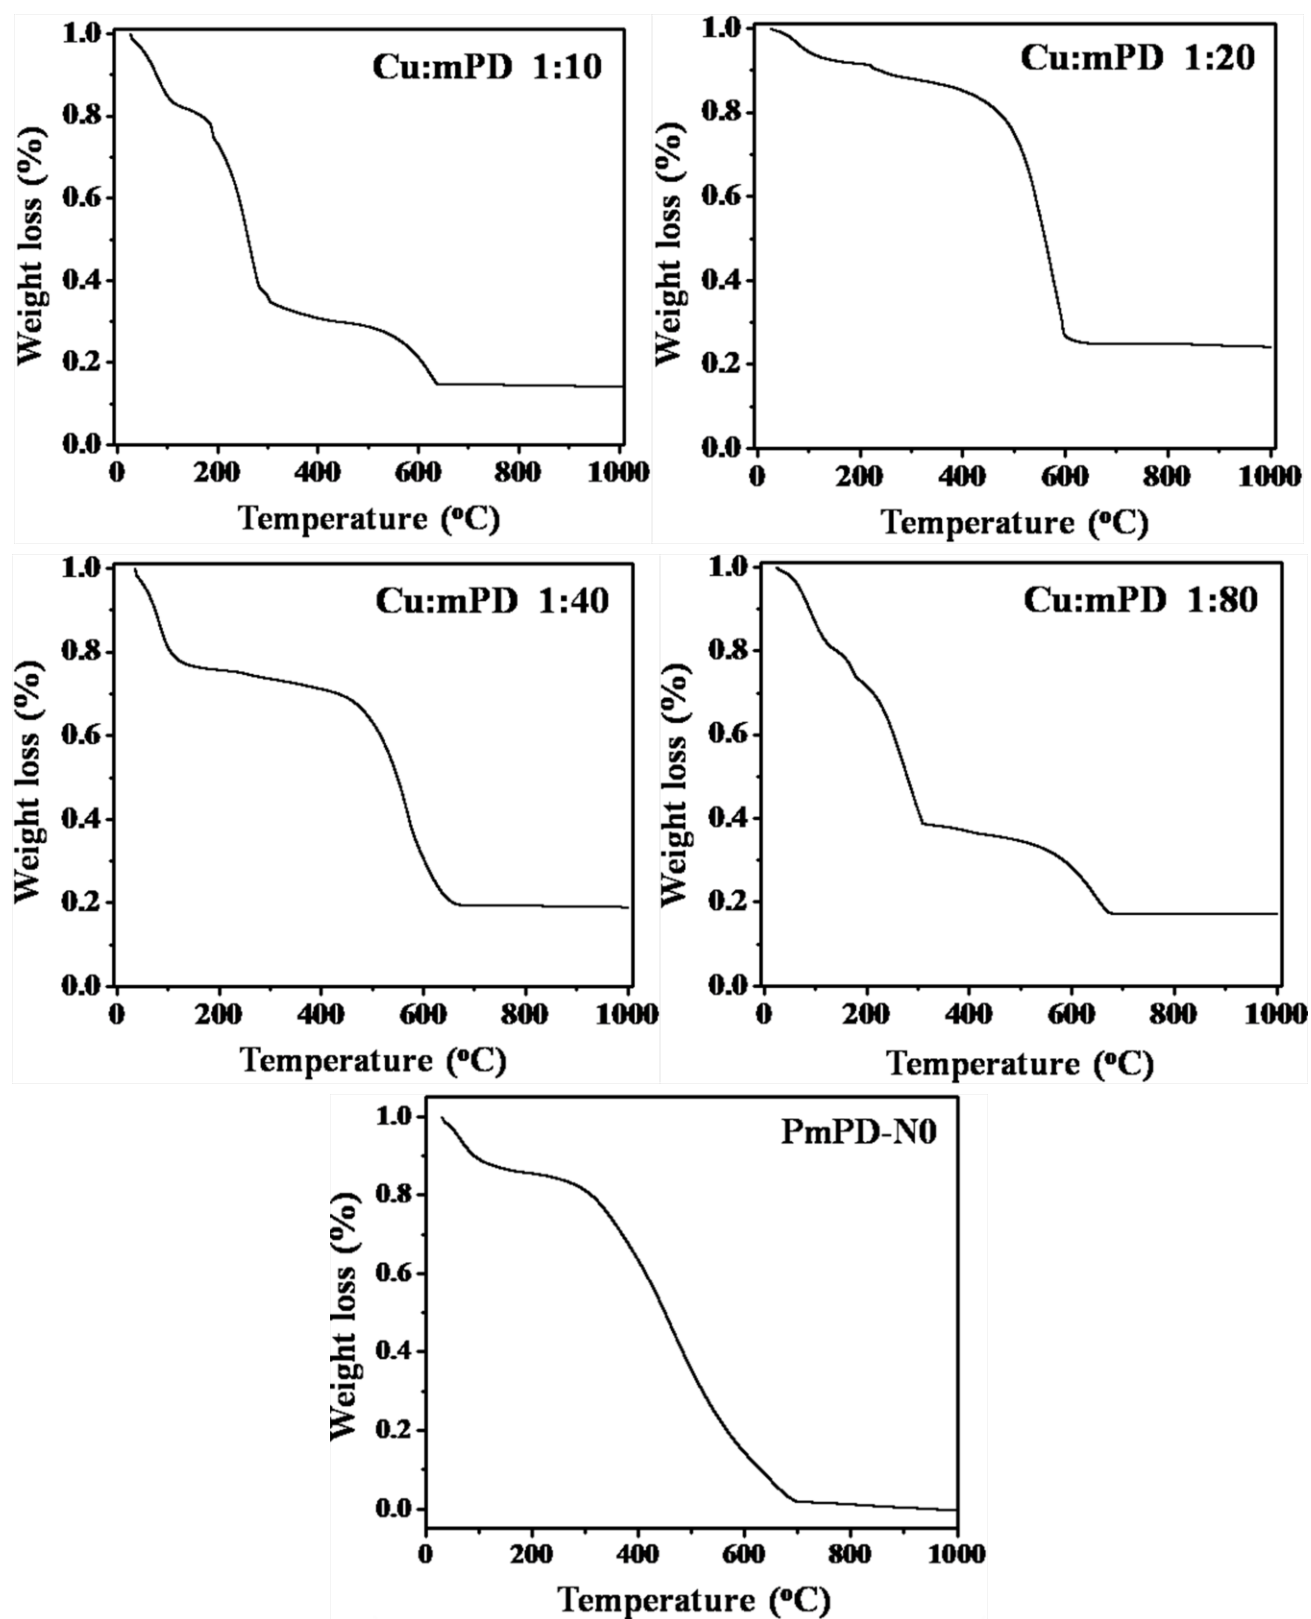



As can be seen from Fig. S7, the suspended intermediate formed before the polymerization degraded rapidly with increasing temperature from 30 °C to 650 °C. When the temperature went up to 700 °C, the four samples did not lose weight, which remain ~20 % of the original weight. However, in the same conditions, the remained mass of PmPD-N0 is only ~1.8 %. As a matter of fact, the raw materials for constituting the suspended intermediate is m-phenylenediamine and  $\text{Cu}^{2+}$ . The organic species in air should be decomposed to relevant gas. But in such condition, Cu species are still in the solid form. So the remaining mass should be the Cu species. This proves that the suspended intermediate contains abundant Cu ions.

**Fig. S8** UV-vis spectra of suspended intermediate formed before the polymerization.

The suspended intermediate was dissolved in DMF.

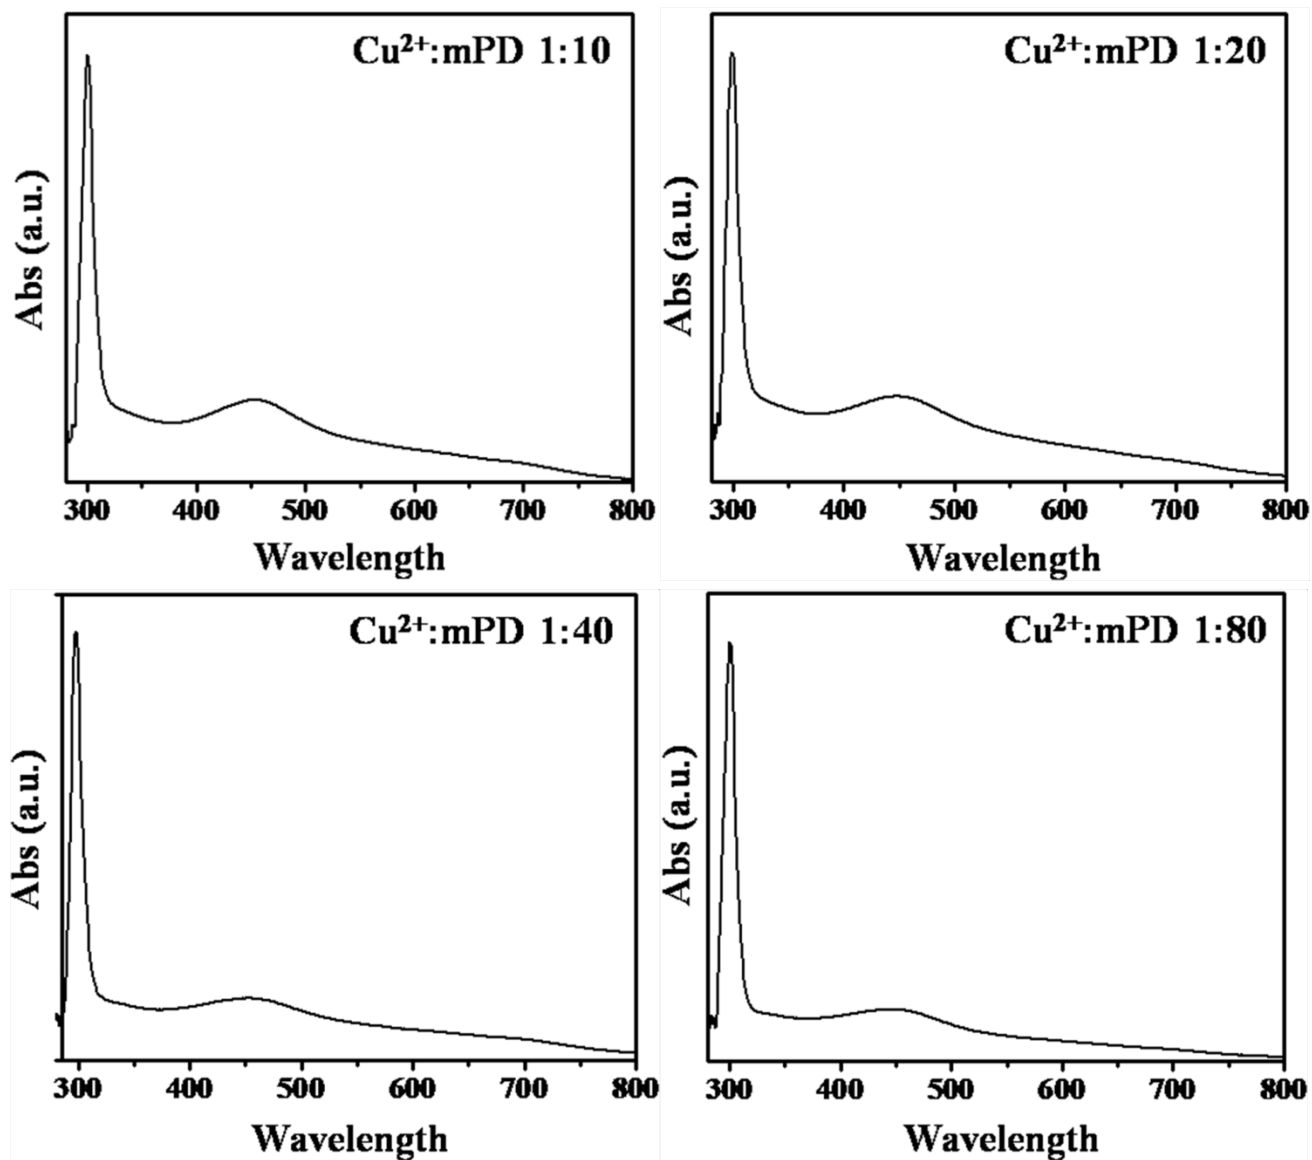

**Fig. S9** UV-vis spectrum of mPD.

The mPD monomer was dissolved in DMF.

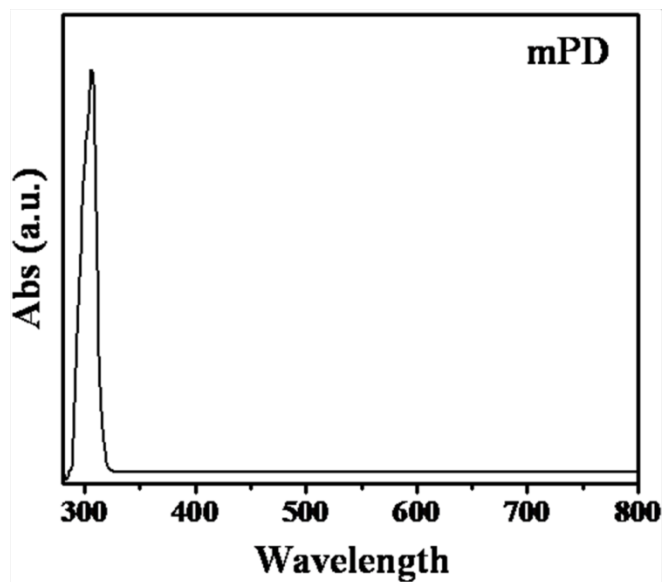

**Fig. S10** TEM images of complex precipitate.

A:  $\text{Cu}^{2+}$ :mPD of 1:10; B:  $\text{Cu}^{2+}$ :mPD of 1:20; C:  $\text{Cu}^{2+}$ :mPD of 1:40; D:  $\text{Cu}^{2+}$ :mPD of 1:80.

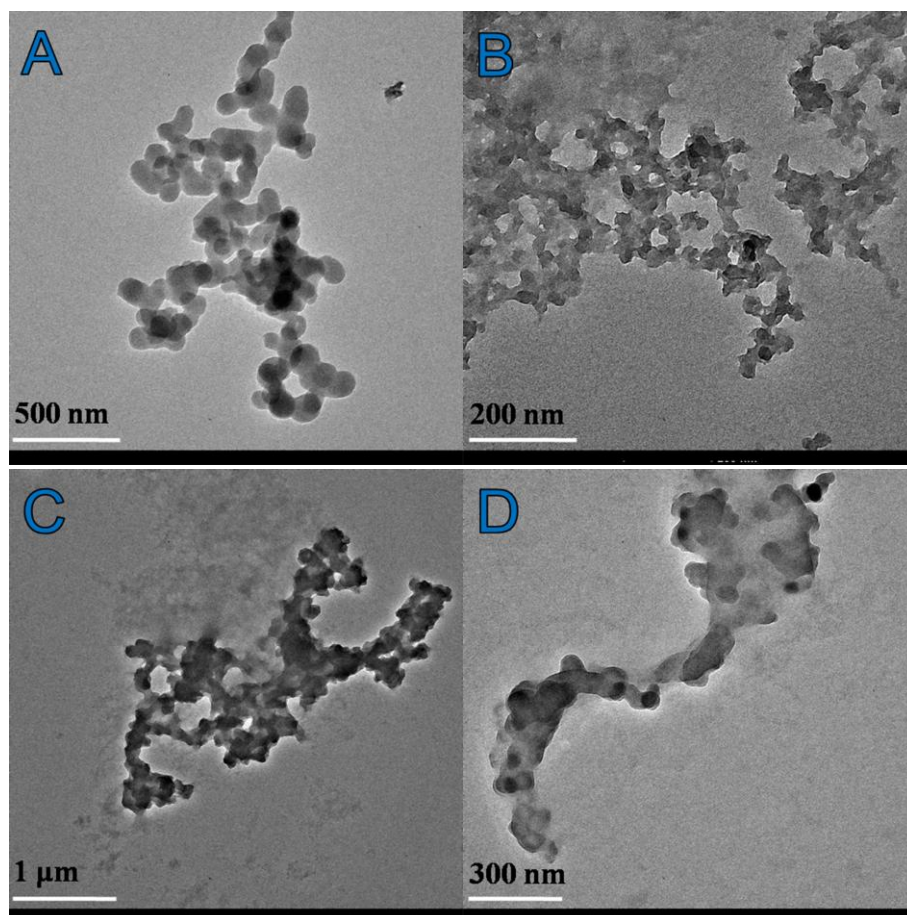

**Fig. S11** The polymerization replacing the  $\text{Cu}^{2+}$  with the complex nanoparticle structure (0.1 g).

The complex nanoparticle structure were synthesized with condition of  $\text{Cu}^{2+}$ :mPD ratio of 1:20.

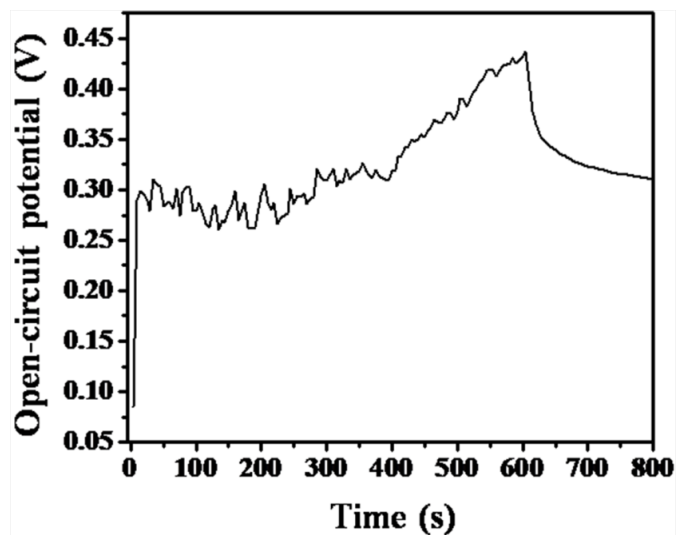

SEM image of the PmPDs prepared with using 0.1 g of the complex nanoparticle structure.

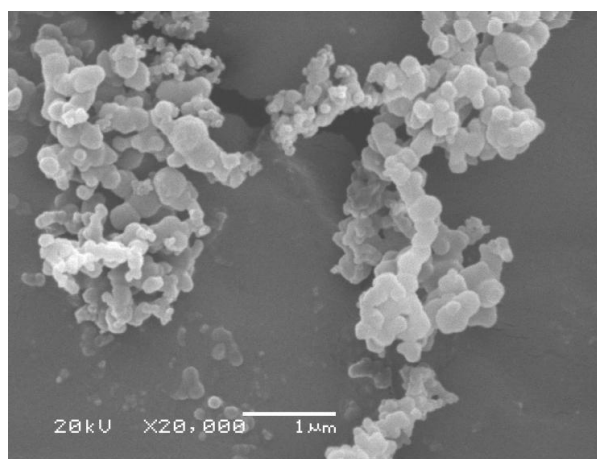

**Fig. S12** SEM image and yield of the PmPD synthesized with HCl solution as solvent at the presence of  $\text{Cu}^{2+}$ .

The HCl concentration is 0.6 M. Other procedures are the same as that in Experiment Section in main text.

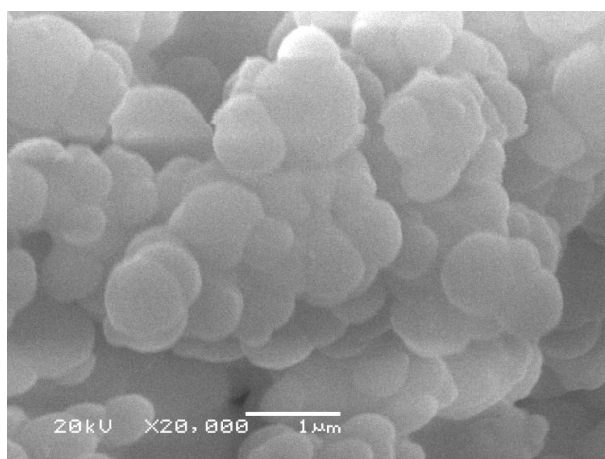

The yield of this product is only 42 %. For one thing, the absence of complex nanoparticle structure should be one of the key reasons. For another, the protonation of monomer by  $\text{H}^+$  should be another key reason. This is because the protonation of monomer restricts its oxidation and subsequently the polymerization.

**Fig. S13** Cu concentration in solution before, during and after the polymerization.

We detected the Cu concentration of the polymerization with  $\text{Cu}^{2+}$ :mPD ratio of 1:10.

Note: 0 min corresponds to “before the polymerization”; 0-180 min corresponds to “during the polymerization”; within the range of 0-180 min, the 0-10 min corresponds to “initiating the polymerization by adding persulfate”; 180 min corresponds to “after the polymerization”.

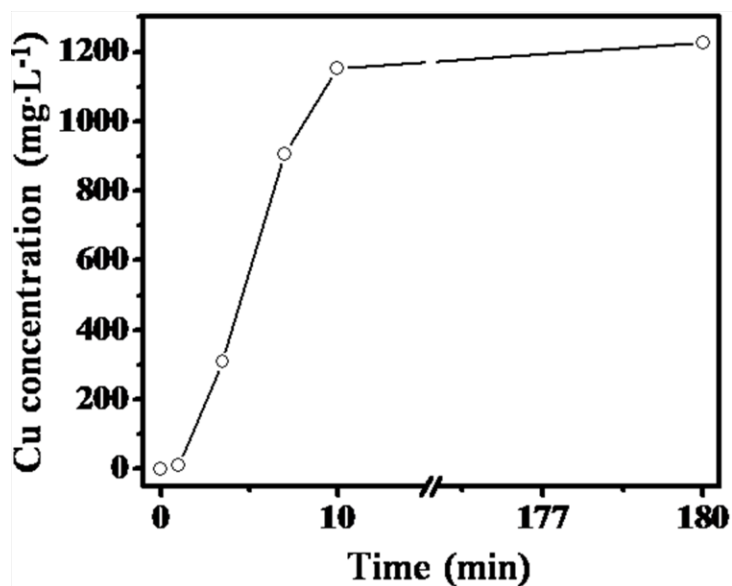

From Fig. S13, the Cu concentration is very low ( $\sim 0.1 \text{ mg}\cdot\text{L}^{-1}$ ; 0 min) before the polymerization. When adding persulfate to initiate the polymerization (0-10 min), the Cu concentration increases rapidly. After the addition of persulfate (10-180 min), the Cu concentration does not change much, which maintains at  $\sim 1230 \text{ mg}\cdot\text{L}^{-1}$ . This is very close to the Cu concentration of  $1480 \text{ mg}\cdot\text{L}^{-1}$  calculated in ideal conditions.

**Fig. S14** pH versus time for the polymerization.

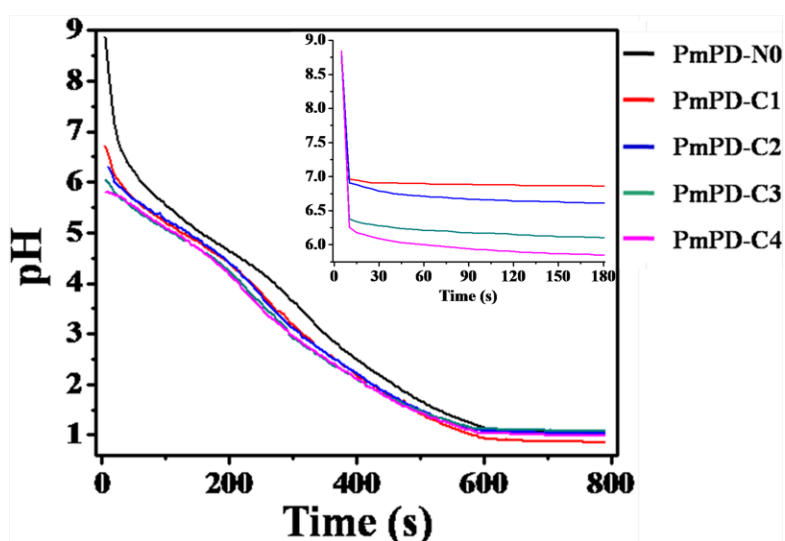

As can be seen in Fig. S14, the solution pH declines very fast with adding persulfate oxidant. Noticeably, the initial solution pH for the polymerization of PmPD-N0 is higher than that of PmPD-Cx (x: 1, 2, 3, 4). This should be due to the addition of  $\text{Cu}^{2+}$  prior to the persulfate, as shown in the inner image of Fig. S14.



**Table S1.** The molecular weight of complex precipitate.

| <b>PmPD-Cx</b> | <b>M<sub>n</sub></b> | <b>M<sub>w</sub></b> | <b>PD</b> |
|----------------|----------------------|----------------------|-----------|
| 1              | 372                  | 386                  | 1.0376    |
| 2              | 378                  | 385                  | 1.0185    |
| 3              | 424                  | 452                  | 1.0660    |
| 4              | 375                  | 393                  | 1.0480    |

**Table S2.** Kinetics model equation for Orange G adsorption onto the PmPD.

| Models              | PmPD-xx   | Equations                             | Correlation<br>efficiency | Standard<br>deviation | Rate constant ( <i>k</i> )<br>[min <sup>-1</sup> ] /<br>Initial adsorption rate<br>( <i>h</i> ) [mg·g <sup>-1</sup> ·min <sup>-1</sup> ] |
|---------------------|-----------|---------------------------------------|---------------------------|-----------------------|------------------------------------------------------------------------------------------------------------------------------------------|
|                     |           |                                       |                           |                       |                                                                                                                                          |
| Pseudo-first-order  | <i>N0</i> | $\log(Q_e-Q_t) = -0.00733t + 2.03598$ | -0.93749                  | 0.06697               | $k=0.01688099$                                                                                                                           |
|                     | <i>C1</i> | $\log(Q_e-Q_t) = -0.00871t + 2.27206$ | -0.81412                  | 0.15290               | $k=0.02005913$                                                                                                                           |
|                     | <i>C2</i> | $\log(Q_e-Q_t) = -0.00997t + 2.19271$ | -0.78933                  | 0.19081               | $k=0.02296091$                                                                                                                           |
|                     | <i>C3</i> | $\log(Q_e-Q_t) = -0.01745t + 2.26844$ | -0.94698                  | 0.14565               | $k=0.04018735$                                                                                                                           |
|                     | <i>C4</i> | $\log(Q_e-Q_t) = -0.01292t + 2.33049$ | -0.93601                  | 0.11948               | $k=0.02975476$                                                                                                                           |
| Pseudo-second-order | <i>N0</i> | $t/Q_t = 0.00683t + 0.11860$          | 0.98532                   | 0.08259               | $h=0.000393$                                                                                                                             |
|                     | <i>C1</i> | $t/Q_t = 0.00296t + 0.02265$          | 0.99607                   | 0.01837               | $h=0.000387$                                                                                                                             |
|                     | <i>C2</i> | $t/Q_t = 0.00311t + 0.01577$          | 0.99796                   | 0.01387               | $h=0.000613$                                                                                                                             |
|                     | <i>C3</i> | $t/Q_t = 0.00313t + 0.01398$          | 0.99929                   | 0.00825               | $h=0.000701$                                                                                                                             |
|                     | <i>C4</i> | $t/Q_t = 0.00300t + 0.02136$          | 0.99815                   | 0.01276               | $h=0.000421$                                                                                                                             |

**Table S3.** Isotherm model equations for Orange G adsorption onto the PmPD.

| Models     | PmPD-xx   | Equations                             | Correlation | Standard  | Q <sub>m</sub>        |
|------------|-----------|---------------------------------------|-------------|-----------|-----------------------|
|            |           |                                       | efficiency  | deviation | [mg·g <sup>-1</sup> ] |
| Langmuir   | <i>N0</i> | $C_e/Q_e=0.00610C_e + 0.000729$       | 0.99998     | 0.00498   | 163.9                 |
|            | <i>C1</i> | $C_e/Q_e=0.00282C_e + 0.00558$        | 0.99993     | 0.00463   | 354.6                 |
|            | <i>C2</i> | $C_e/Q_e = 0.00264C_e + 0.02249$      | 0.99345     | 0.04085   | 378.8                 |
|            | <i>C3</i> | $C_e/Q_e = 0.00297C_e + 0.00321$      | 0.99996     | 0.00403   | 336.7                 |
|            | <i>C4</i> | $C_e/Q_e y= 0.00258C_e + 0.0076$      | 0.99979     | 0.00695   | 387.6                 |
| -----      |           |                                       |             |           |                       |
| Freundlich | <i>N0</i> | $\log Q_e= 0.06194\log C_e + 2.08965$ | 0.8891      | 0.1218    |                       |
|            | <i>C1</i> | $\log Q_e= 0.16035\log C_e + 2.18822$ | 0.8595      | 0.1235    |                       |
|            | <i>C2</i> | $\log Q_e= 0.15899\log C_e + 2.17154$ | 0.8397      | 0.1331    |                       |
|            | <i>C3</i> | $\log Q_e= 0.15217\log C_e + 2.18931$ | 0.8520      | 0.1310    |                       |
|            | <i>C4</i> | $\log Q_e= 0.18019\log C_e + 2.18346$ | 0.7442      | 0.0729    |                       |
